# Supplementary material for: A portable dual-smog-chamber system for atmospheric aerosol field studies
Source: Copernicus journal article supplement (doi:10.5194/amt-12-2733-2019), 2019-05-14
Supplement: Supplementary file 1 [file amt-12-2733-2019-supplement.pdf]

Supplement of Atmos. Meas. Tech., 12, 2733–2743, 2019  
<https://doi.org/10.5194/amt-12-2733-2019-supplement>  
© Author(s) 2019. This work is distributed under  
the Creative Commons Attribution 4.0 License.

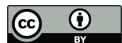

*Supplement of*

## **A portable dual-smog-chamber system for atmospheric aerosol field studies**

**Christos Kaltsonoudis et al.**

*Correspondence to:* Spyros N. Pandis ([spyros@chemeng.upatras.gr](mailto:spyros@chemeng.upatras.gr))

The copyright of individual parts of the supplement might differ from the CC BY 4.0 License.

**Table S1:** List of performed experiments

| Exp. | Date     | Type                            | Added components                               | Initial Concentrations                                                  | Comments                                                                                                                                |
|------|----------|---------------------------------|------------------------------------------------|-------------------------------------------------------------------------|-----------------------------------------------------------------------------------------------------------------------------------------|
| 1    | 11/5/14  | Blank/contamination             | Clean air                                      |                                                                         | Initial characterization experiments. Study of possible contamination due to leaks and/or due to components different than those added. |
| 2    | 5/11/14  | Blank/contamination             | Clean air, AS seeds                            | 15 $\mu\text{g m}^{-3}$ AS                                              |                                                                                                                                         |
| 3    | 13/11/14 | Blank/contamination             | Clean air                                      |                                                                         |                                                                                                                                         |
| 4    | 19/11/14 | Blank/contamination             | Clean air, a-pinene, O <sub>3</sub>            | 10 ppb APin<br>110 ppb O <sub>3</sub>                                   |                                                                                                                                         |
| 5    | 20/11/14 | Blank/contamination             | Clean air                                      |                                                                         |                                                                                                                                         |
| 6    | 28/1/15  | Blank/contamination             | Clean air, AS seeds                            | 10 $\mu\text{g m}^{-3}$ AS                                              |                                                                                                                                         |
| 7    | 29/3/15  | Blank/contamination             | Clean air, AS seeds, O <sub>3</sub> , a-pinene | 10 $\mu\text{g m}^{-3}$ AS<br>60 ppb O <sub>3</sub><br>10 ppb APin      |                                                                                                                                         |
| 8    | 4/5/15   | Blank/contamination             | Clean air                                      |                                                                         |                                                                                                                                         |
| 9    | 9/6/15   | $J_{\text{NO}_2}$ measurement   | NO, O <sub>3</sub>                             | 190 ppb NO <sub>2</sub><br>66 ppb O <sub>3</sub>                        | $J_{\text{NO}_2}$ measurement                                                                                                           |
| 10   | 14/10/15 | Field test (Patras)             | Ambient air                                    | 1 $\mu\text{g m}^{-3}$ PM <sub>1</sub>                                  | Initial field deployment for system evaluation                                                                                          |
| 11   | 15/10/15 | Field test (Patras)             | Zero air, seeds                                | 15 $\mu\text{g m}^{-3}$ AS                                              |                                                                                                                                         |
| 12   | 16/10/15 | Field test (Patras)             | Ambient air, a-pinene                          | 1 $\mu\text{g m}^{-3}$ PM <sub>1</sub><br>20 ppb APin                   |                                                                                                                                         |
| 13   | 28/5/16  | Field test/FAME16 <sup>a</sup>  | Zero air, AS seeds                             | 10 $\mu\text{g m}^{-3}$ AS                                              | Campaign deployment for system evaluation                                                                                               |
| 14   | 30/5/16  | Field test/FAME16 <sup>a</sup>  | Ambient air, HONO, AS seeds                    | 0.75 $\mu\text{g m}^{-3}$ PM <sub>1</sub><br>11 $\mu\text{g m}^{-3}$ AS |                                                                                                                                         |
| 15   | 31/5/16  | Field test/FAME16 <sup>a</sup>  | Ambient air, HONO, AS seeds                    | 0.9 $\mu\text{g m}^{-3}$ PM <sub>1</sub><br>30 $\mu\text{g m}^{-3}$ AS  |                                                                                                                                         |
| 16   | 1/6/16   | Field test/FAME 16 <sup>a</sup> | Ambient air, HONO, AS seeds                    | 0.4 $\mu\text{g m}^{-3}$ PM <sub>1</sub><br>20 $\mu\text{g m}^{-3}$ AS  |                                                                                                                                         |
| 17   | 24/2/17  | Particle wall loss              | Clean air, AS seeds                            | 15 $\mu\text{g m}^{-3}$ AS                                              | Wall loss tests                                                                                                                         |
| 18   | 28/2/17  | Particle wall loss              | Clean air, AS seeds                            | 25 $\mu\text{g m}^{-3}$ AS                                              |                                                                                                                                         |
| 19   | 2/3/17   | Particle wall loss              | Clean air, AS seeds                            | 50 $\mu\text{g m}^{-3}$ AS                                              |                                                                                                                                         |
| 20   | 13/3/17  | Particle wall loss              | Clean air, AS seeds                            | 150 $\mu\text{g m}^{-3}$ AS                                             |                                                                                                                                         |
| 21   | 14/3/17  | Particle wall loss              | Clean air,                                     | 100 $\mu\text{g m}^{-3}$ AS                                             |                                                                                                                                         |

|    |          |                                              |                          |                                                  |                                                                                          |
|----|----------|----------------------------------------------|--------------------------|--------------------------------------------------|------------------------------------------------------------------------------------------|
|    |          |                                              | AS seeds                 |                                                  |                                                                                          |
| 22 | 15/3/17  | Particle wall loss                           | Clean air,<br>AS seeds   | 150 $\mu\text{g m}^{-3}$ AS                      |                                                                                          |
| 23 | 28/3/17  | Particle wall loss                           | Clean air,<br>AS seeds   | 1500 $\mu\text{g m}^{-3}$ AS                     |                                                                                          |
| 24 | 31/3/17  | Particle wall loss                           | Clean air,<br>AS seeds   | 1500 $\mu\text{g m}^{-3}$ AS                     |                                                                                          |
| 25 | 11/4/17  | Ambient sampling<br>efficiency               | Ambient air              | 1.2 $\mu\text{g m}^{-3}$ PM <sub>1</sub>         | Sampling efficiency of<br>pumps/tubing                                                   |
| 26 | 13/4/17  | Ambient sampling<br>efficiency               | Ambient air              | 0.6 $\mu\text{g m}^{-3}$ PM <sub>1</sub>         |                                                                                          |
| 27 | 14/4/17  | Ambient sampling<br>efficiency               | Ambient air              | 1 $\mu\text{g m}^{-3}$ PM <sub>1</sub>           |                                                                                          |
| 28 | 25/4/17  | Particle wall loss                           | Clean air,<br>AS seeds   | 2000 $\mu\text{g m}^{-3}$ AS                     | Wall loss tests                                                                          |
| 29 | 24/5/17  | Particle wall loss                           | Clean air,<br>AS seeds   | 15 $\mu\text{g m}^{-3}$ AS                       |                                                                                          |
| 30 | 25/5/17  | Particle wall loss                           | Clean air,<br>AS seeds   | 13 $\mu\text{g m}^{-3}$ AS                       |                                                                                          |
| 31 | 1/6/17   | Ambient sampling<br>efficiency               | Ambient air              | 1.4 $\mu\text{g m}^{-3}$ PM <sub>1</sub>         | Sampling efficiency<br>characterization                                                  |
| 32 | 12/6/17  | Ambient sampling<br>efficiency               | Ambient air              | 4 $\mu\text{g m}^{-3}$ PM <sub>1</sub>           |                                                                                          |
| 33 | 16/6/17  | Particle wall loss                           | Clean air,<br>AS seeds   | 160 $\mu\text{g m}^{-3}$ AS                      |                                                                                          |
| 34 | 21/6/17  | Particle wall loss                           | Clean air,<br>AS seeds   | 70 $\mu\text{g m}^{-3}$ AS<br>RH= 35-85%         | Wall losses under<br>different RH conditions                                             |
| 35 | 22/6/17  | Particle wall loss                           | Clean air,<br>AS seeds   | 350 $\mu\text{g m}^{-3}$ AS                      |                                                                                          |
| 36 | 26/6/17  | Pump contamination<br>test                   | Clean air                |                                                  | Testing for potential<br>VOC contamination                                               |
| 37 | 8/9/17   | Ambient sampling<br>efficiency               | Ambient air              | 1.4 $\mu\text{g m}^{-3}$ PM <sub>1</sub>         |                                                                                          |
| 38 | 2/9/17   | HONO blank                                   | Clean air<br>HONO        | ~100 ppb<br>HONO                                 |                                                                                          |
| 39 | 4/10/17  | J <sub>NO<sub>2</sub></sub> characterization | NO,<br>O <sub>3</sub>    | 470 ppb NO <sub>2</sub><br>15 ppb O <sub>3</sub> | J <sub>NO<sub>2</sub></sub> = 0.03 min <sup>-1</sup>                                     |
| 40 | 10/10/17 | HONO blank                                   | Clean air<br>HONO        | ~100 ppb<br>HONO                                 | Testing for potential<br>contamination during<br>HONO injection and<br>photolysis        |
| 41 | 16/10/17 | HONO blank                                   | Clean air<br>HONO        | ~100 ppb<br>HONO                                 |                                                                                          |
| 42 | 7/12/17  | Ambient test                                 | Ambient air              | 1.4 $\mu\text{g m}^{-3}$ PM                      | Chamber similarity                                                                       |
| 43 | 16/12/17 | RH increase blank                            | Clean air                |                                                  | Testing for potential<br>contamination during<br>water vapor injection to<br>increase RH |
| 44 | 23/4/18  | Oxidation of ambient<br>air, Pittsburgh, PA  | Ambient air,<br>HONO, AS | 3.6 $\mu\text{g m}^{-3}$ PM <sub>1</sub>         | Pilot study for system<br>evaluation                                                     |

|    |         |                                        | seeds                                                                                     |                                                 |                                                                          |                                                                                                   |
|----|---------|----------------------------------------|-------------------------------------------------------------------------------------------|-------------------------------------------------|--------------------------------------------------------------------------|---------------------------------------------------------------------------------------------------|
| 45 | 15/2/19 | HONO, NO <sub>x</sub> , O <sub>3</sub> | Clean air,<br>O <sub>3</sub> ,<br>RH<10%<br>$J_{\text{NO}_2}=0.03$<br>min <sup>-1</sup>   | 145 ppb O <sub>3</sub>                          | Interactions between<br>NO <sub>x</sub> , O <sub>3</sub> , and the walls |                                                                                                   |
| 46 | 18/2/19 | HONO, NO <sub>x</sub> , O <sub>3</sub> | Clean air,<br>NO, d-<br>butanol,<br>RH<10%<br>$J_{\text{NO}_2}=0.03$<br>min <sup>-1</sup> | 15 ppb O <sub>3</sub>                           |                                                                          |                                                                                                   |
| 47 | 19/2/19 | HONO, NO <sub>x</sub> , O <sub>3</sub> | Clean air,<br>O <sub>3</sub> , RH 42%,<br>$J_{\text{NO}_2}=0.03$<br>min <sup>-1</sup>     | 150 ppb O <sub>3</sub>                          |                                                                          |                                                                                                   |
| 48 | 21/2/19 | HONO, NO <sub>x</sub> , O <sub>3</sub> | Clean air,<br>NO, d-<br>butanol,<br>RH=49%<br>$J_{\text{NO}_2}=0.03$<br>min <sup>-1</sup> | 12 ppb NO                                       |                                                                          |                                                                                                   |
| 49 | 25/2/19 | HONO, NO <sub>x</sub> , O <sub>3</sub> | Clean air,<br>O <sub>3</sub> ,<br>RH<10%<br>$J_{\text{NO}_2}=0.11$<br>min <sup>-1</sup>   | 60 ppb O <sub>3</sub>                           |                                                                          |                                                                                                   |
| 50 | 26/2/19 | HONO, NO <sub>x</sub> , O <sub>3</sub> | Clean air,<br>NO, d-<br>butanol,<br>RH<10%<br>$J_{\text{NO}_2}=0.11$<br>min <sup>-1</sup> | 26 ppb NO                                       |                                                                          |                                                                                                   |
| 51 | 26/2/19 | $J_{\text{NO}_2}$ characterization     | NO,<br>O <sub>3</sub>                                                                     | 50 ppb NO <sub>2</sub><br>42 ppb O <sub>3</sub> |                                                                          | Low UV $J_{\text{NO}_2}$ 0.03 min <sup>-1</sup><br>Hi UV $J_{\text{NO}_2}$ 0.11 min <sup>-1</sup> |
| 52 | 27/2/19 | HONO, NO <sub>x</sub> , O <sub>3</sub> | Clean air,<br>NO, d-<br>butanol,<br>RH 56%<br>$J_{\text{NO}_2}=0.11$<br>min <sup>-1</sup> | 46 ppb NO                                       |                                                                          | Effects of RH and UV<br>on HONO off-gassing<br>and OH production                                  |
| 53 | 28/2/19 | HONO, NO <sub>x</sub> , O <sub>3</sub> | Clean air,<br>RH 46%<br>$J_{\text{NO}_2}=0.11$<br>min <sup>-1</sup>                       |                                                 |                                                                          |                                                                                                   |
| 54 | 1/3/19  | HONO, NO <sub>x</sub> , O <sub>3</sub> | Clean air,<br>O <sub>3</sub> , RH 47%<br>$J_{\text{NO}_2}=0.11$<br>min <sup>-1</sup>      | 30 ppb O <sub>3</sub>                           |                                                                          |                                                                                                   |
| 55 | 3/3/19  | VOC wall losses                        | Clean air,                                                                                | 140 ppb Tol.                                    | VOC losses                                                               |                                                                                                   |

|    |        |                 |                        |              |
|----|--------|-----------------|------------------------|--------------|
|    |        |                 | Toluene                |              |
| 56 | 3/3/19 | VOC wall losses | Clean air,<br>Toluene  | 80 ppb Tol.  |
| 57 | 4/3/19 | VOC wall losses | Clean air,<br>a-pinene | 180 ppb APin |
| 58 | 4/3/19 | VOC wall losses | Clean air,<br>a-pinene | 150 ppb APin |

<sup>a</sup>FAME 16: Finokalia Aerosol Measurement Experiment 2016, Finokalia, Greece.

## 1. Chamber Artificial Light Spectrum

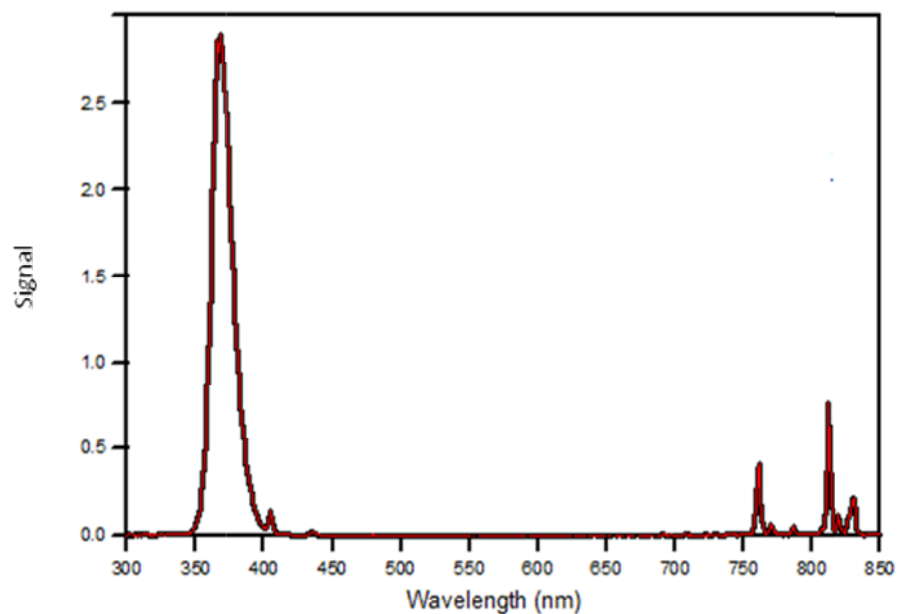

**Figure S1.** The artificial light spectrum of the dual smog chamber system.

## 2. Auxiliary mechanism for the dual smog chamber system

$\text{NO}_x \rightarrow \text{Wall (NO}_x\text{)}$

- For dark chamber, low RH (<10%): Negligible (below detection limit)

- For  $J_{\text{NO}_2}=0.03 \text{ min}^{-1}$ , low RH (<10%):  $2.8 \times 10^{-6}$  -  $4 \times 10^{-6} \text{ s}^{-1}$
- For  $J_{\text{NO}_2}=0.1 \text{ min}^{-1}$ , low RH (<10%): Negligible (below detection limit)
- For dark chamber, medium RH (40-60%): Negligible (below detection limit)
- For  $J_{\text{NO}_2}=0.03 \text{ min}^{-1}$ , medium RH (40-60%):  $0.8 \times 10^{-6}$  -  $7.4 \times 10^{-6} \text{ s}^{-1}$
- For  $J_{\text{NO}_2}=0.1 \text{ min}^{-1}$ , medium RH (40-60%):  $4.1 \times 10^{-6}$  -  $6.5 \times 10^{-6} \text{ s}^{-1}$

### **O<sub>3</sub> → Wall (O<sub>3</sub>)**

- For dark chamber, low RH (<10%):  $3.1 \times 10^{-6}$  –  $3.9 \times 10^{-6} \text{ s}^{-1}$
- For  $J_{\text{NO}_2}=0.03 \text{ min}^{-1}$ , low RH (<10%):  $2.5 \times 10^{-6}$  –  $4.4 \times 10^{-6} \text{ s}^{-1}$
- For  $J_{\text{NO}_2}=0.1 \text{ min}^{-1}$ , low RH (<10%):  $3.2 \times 10^{-6}$  –  $9.6 \times 10^{-6} \text{ s}^{-1}$
- For dark chamber, medium RH (40-60%):  $2.3 \times 10^{-6}$  –  $5.5 \times 10^{-6} \text{ s}^{-1}$
- For  $J_{\text{NO}_2}=0.03 \text{ min}^{-1}$ , medium RH (40-60%):  $11 \times 10^{-6}$  –  $16 \times 10^{-6} \text{ s}^{-1}$
- For  $J_{\text{NO}_2}=0.1 \text{ min}^{-1}$ , medium RH (40-60%):  $2.8 \times 10^{-6}$  –  $10 \times 10^{-6} \text{ s}^{-1}$

### **Walls → OH (based on d-butanol decay)**

- For  $J_{\text{NO}_2}=0.03 \text{ min}^{-1}$ , low RH (<10%): Below detection limit
- For  $J_{\text{NO}_2}=0.1 \text{ min}^{-1}$ , low RH (<10%): OH production= $3.4 \times 10^3$  -  $7.9 \times 10^3$  molecules  $\text{cm}^{-3} \text{ s}^{-1}$
- For  $J_{\text{NO}_2}=0.03 \text{ min}^{-1}$ , medium RH (40-60%): OH production= $1.9 \times 10^4$  -  $2.2 \times 10^4$  molecules  $\text{cm}^{-3} \text{ s}^{-1}$
- For  $J_{\text{NO}_2}=0.1 \text{ min}^{-1}$ , medium RH (40-60%): OH production= $8 \times 10^3$  –  $5.5 \times 10^4$  molecules  $\text{cm}^{-3} \text{ s}^{-1}$

**Toluene → Wall (Toluene):** Dark, Low RH (<10%): Below detection limit.

**A-pinene → Wall (A-pinene):** Dark, Low RH (<10%): Below detection limit.
